# Supplementary material for: Changes in hydrology affects stream nutrient uptake and primary production in a high-Arctic stream
Source: Springer Nature journal article supplement (doi:10.1007/s10533-020-00719-x), 2020-11-02

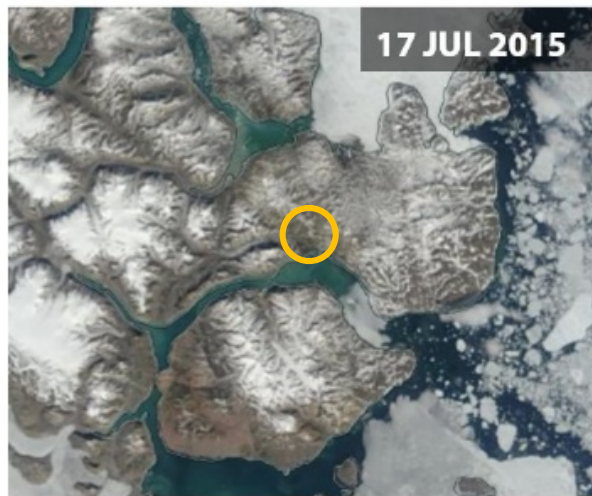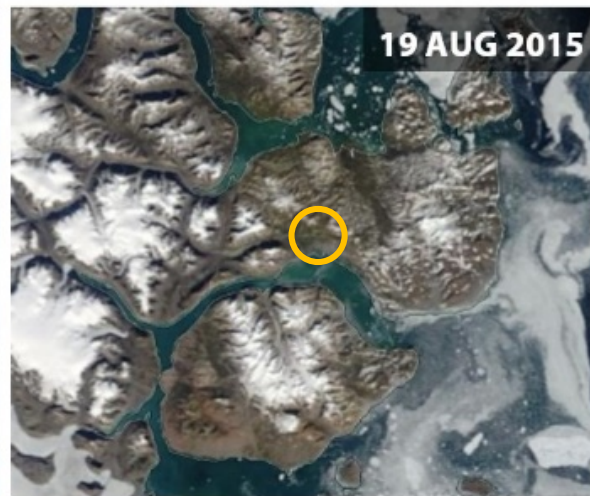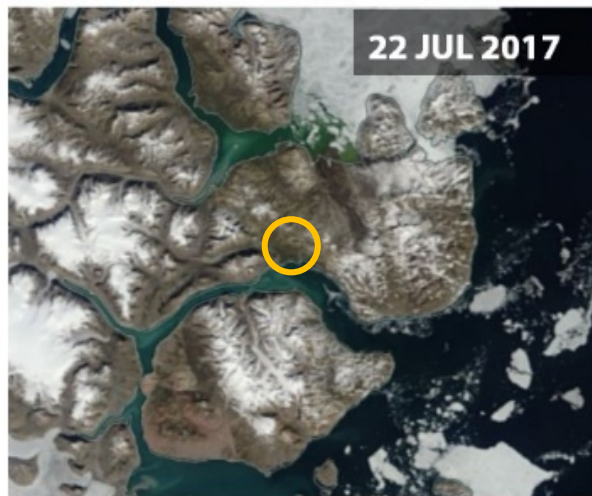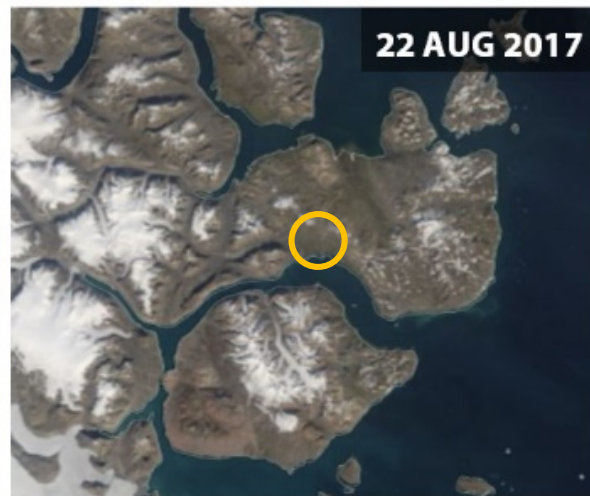

Supplement: 10533_2020_719_MOESM4_ESM.pdf [file 10533_2020_719_MOESM4_ESM.pdf]
